# Supplementary material
Source: Elsevier journal article supplement (https://comptes-rendus.academie-sciences.fr/biologies/article/10.1016/j.crvi.2008.11.007/file/attach/mmc1.pdf)
Supplement: mmc1 [file mmc1.pdf]

**Table.** The location of the accessions of *Hordeum vulgare* L. and serial numbers used in this study.

| Origin              | Accessions           |                            | The number of accessions | Altitude (m) |
|---------------------|----------------------|----------------------------|--------------------------|--------------|
|                     | Two-rowed            | Six-rowed                  |                          |              |
| Tibet               |                      |                            |                          |              |
| Lhasa City          | ZYM1487 ZYM1491      | ZYM1044 ZYM1043            | 4                        | 3650–4200    |
| Qamdo Prefecture    | ZYM1430 ZYM0003      | ZYM0266 ZYM1026            | 8                        | 2840–4100    |
|                     | ZYM1447 ZYM1444      |                            |                          |              |
|                     | ZYM0004 ZYM0017      |                            |                          |              |
| Nyingchi Prefecture | ZYM0977 ZYM0979      |                            | 4                        | 1600–3804    |
|                     | ZYM1456 ZYM1460      |                            |                          |              |
| Shannan Prefecture  | ZYM0997 ZYM1493      | ZYM1955 ZYM0662            | 21                       | 3300–4350    |
|                     | ZYM1495 ZYM0192      | ZYM0437 ZYM0794            |                          |              |
|                     | ZYM1811 ZYM1549      | ZYM0804 ZYM1989            |                          |              |
|                     | ZYM1778 ZYM1513      | ZYM0773 ZYM0752            |                          |              |
|                     | ZYM0115 ZYM1519      | ZYM0724 ZYM0737            |                          |              |
| Xigaze Prefecture   | ZYM0070              |                            | 6                        | 3700–4300    |
|                     | ZYM1816 ZYM1819      | ZYM0724 ZYM0737            |                          |              |
|                     | ZYM0959              | ZYM2197 ZYM0964<br>ZYM2216 |                          |              |
| Nagri Prefecture    | ZYM1839 ZYM0236      |                            | 2                        | 3550–3830    |
| Middle East         |                      |                            |                          |              |
| Outer Caspian Sea   | WYM004               |                            | 1                        |              |
| Syria               | WYM005 WYM006 WYM008 |                            | 4                        | 700–2840     |
|                     | WYM009               |                            |                          |              |
| Israel              | WYM011 WYM015 WYM017 |                            | 40                       | 500–1200     |
|                     | WYM018 WYM024 WYM028 |                            |                          |              |
|                     | WYM029 WYM031 WYM032 |                            |                          |              |
|                     | WYM033 WYM034 WYM036 |                            |                          |              |
|                     | WYM037 WYM039 WYM041 |                            |                          |              |
|                     | WYM044 WYM045 WYM047 |                            |                          |              |
|                     | WYM048 WYM049 WYM050 |                            |                          |              |
|                     | WYM052 WYM053 WYM054 |                            |                          |              |
|                     | WYM055 WYM056 WYM057 |                            |                          |              |
|                     | WYM058 WYM059 WYM060 |                            |                          |              |
|                     | WYM061 WYM072 WYM074 |                            |                          |              |
|                     | WYM080 WYM084 WYM085 |                            |                          |              |
|                     | WYM086 WYM088 WYM239 |                            |                          |              |
|                     | WYM240               |                            |                          |              |
|                     | Total                | 71                         |                          |              |

The serial number of the accession is the accession number: ZYM (Zhong Ye Mai, in Chinese); WYM (Wai Ye Mai, in Chinese)
